# Supplementary material for: Deep learning-based hyperspectral image correction and unmixing for brain tumor surgery
Source: PubMed Central journal article supplement (PMC11613202; doi:10.1016/j.isci.2024.111273), 2024-10-28
Supplement: mmc1.pdf [file mmc1.pdf]

**iScience, Volume 27**

## **Supplemental information**

### **Deep learning-based hyperspectral image correction and unmixing for brain tumor surgery**

**David Black, Jaidev Gill, Andrew Xie, Benoit Liquet, Antonio Di Ieva, Walter Stummer, and Eric Suero Molina**

**Supplemental Table S1: Human Brain Tissue**

| <b>Category</b>                   | <b># of Data Cubes</b> | <b># of Patients</b> |
|-----------------------------------|------------------------|----------------------|
| <b><i>Tissue Type</i></b>         | <b>632</b>             | <b>130</b>           |
| Pilocytic Astrocytoma             | 5                      | 2                    |
| Diffuse Astrocytoma               | 60                     | 17                   |
| Anaplastic Astrocytoma            | 51                     | 10                   |
| Glioblastoma                      | 415                    | 77                   |
| Grade II Oligodendroglioma        | 24                     | 5                    |
| Ganglioglioma                     | 4                      | 2                    |
| Medulloblastoma                   | 6                      | 2                    |
| Anaplastic Ependymoma             | 8                      | 2                    |
| Anaplastic Oligodendroglioma      | 4                      | 1                    |
| Meningioma                        | 37                     | 8                    |
| Metastasis                        | 6                      | 2                    |
| Radiation Necrosis                | 20                     | 4                    |
|                                   |                        |                      |
| <b><i>Margins (Gliomas)</i></b>   | <b>288</b>             | <b>67</b>            |
| Reactively altered brain tissue   | 100                    | 22                   |
| Infiltrating zone                 | 57                     | 18                   |
| Solid tumor                       | 131                    | 27                   |
|                                   |                        |                      |
| <b><i>WHO Grade (Gliomas)</i></b> | <b>571</b>             | <b>119</b>           |
| Grade I                           | 9                      | 3                    |
| Grade II                          | 84                     | 20                   |
| Grade III                         | 57                     | 15                   |
| Grade IV                          | 421                    | 81                   |
|                                   |                        |                      |
| <b><i>IDH Classification</i></b>  | <b>411</b>             | <b>76</b>            |
| Mutant                            | 126                    | 26                   |
| Wildtype                          | 285                    | 50                   |
